# Supplementary material for: Zn2+-Intercalated V2O5·nH2O derived from V2CTx MXene for hyper-stable zinc-ion storage
Source: Royal Society of Chemistry journal article supplement (doi:10.1039/d1ta05526g), 2021-01-01
Supplement: d1ta05526g1.pdf [file d1ta05526g1.pdf]

## Electronic Supplementary Information

### **Zn<sup>2+</sup>-intercalated V<sub>2</sub>O<sub>5</sub>·nH<sub>2</sub>O Derived from V<sub>2</sub>CT<sub>x</sub> MXene for Hyper-stable Zinc-Ion Storage**

Xiaodong Zhu,<sup>a,b</sup> Wenjie Wang,<sup>b</sup> Ziyi Cao,<sup>a,c</sup> Shangpeng Gao,<sup>b</sup> Mason Oliver Lam Chee,<sup>d</sup>

Xiang Zhang,<sup>e</sup> Pei Dong,<sup>d</sup> Pulickel M. Ajayan,<sup>e</sup> Mingxin Ye<sup>\*a</sup> and Jianfeng Shen<sup>\*a</sup>

<sup>a</sup>Institute of special materials and technology, Fudan University, Shanghai 200433, P. R.

China

<sup>b</sup>Department of Materials Science, Fudan University, Shanghai 200433, P. R. China

<sup>c</sup>Department of Chemistry, Fudan University, Shanghai 200433, P. R. China

<sup>d</sup>Department of Mechanical Engineering, George Mason University, VA 22030, USA

<sup>e</sup>Department of Materials Science and Nano Engineering, Rice University, Houston 70054,

USA

\*Corresponding: mxye@fudan.edu.cn; jfshen@fudan.edu.cn

## Experimental Section

### Synthesis of Pre-Alkalized $V_2CT_x$

Vanadium (Aladdin reagent, 99.5 wt% purity), aluminum (Aladdin reagent, 99.5 wt% purity), and graphite (Aladdin reagent, 99.95 wt% purity) powders were blended with the molar ratio of 2.0:1.16:1.0 and then ground for 10 h at 580 rotations per minute in isopropanol. Mixed powders were prepared by vacuum drying at 45 °C for 10 h. Subsequently, cold pressing mixed powders at 16 MPa and sintered in an argon atmosphere at 1510 °C for 4 h. Obtained MAX ceramics was grounded with a 200 mesh sieve.

Slowly add 1.0 g  $V_2AlC$  MAX to 50 mL of 40 wt% HF solution (SCR Co., GR grade). After continuous stirring at 35 °C for 72 hours, the resulting mixture solution was washed by centrifugation with deionized water several times until the pH value was ~7. Then, the black colloidal precipitate was freeze-dried for 48 hours to gain  $V_2CT_x$  MXene. Then, the  $V_2CT_x$  powder was alkalization-treated by  $6 \times 10^{-3}$  M NaOH (Aladdin Reagent, 99.9 wt% purity) solution for 8 h. The product is then centrifuged and washed, and freeze-dried for 48 h.

### Synthesis of $V_2CT_x-Zn_{0.25}V_2O_5 \cdot nH_2O$ and Oxidized $V_2CT_x$

0.25 g alkalized  $V_2CT_x$  was added to 32 mL 0.2 M  $ZnCl_2$  (SMBT Co., Ltd, GR grade) solution. After 1.0 h of strong stirring, slowly add 1.5 mL of  $H_2O_2$  (Aladdin Reagent, Ltd, 30 wt%) solution into the dispersion, and then transfer to the autoclave. The one-pot hydrothermal reaction was carried out under 160 °C for 10 h. Then,  $V_2CT_x-Zn_xV_2O_5 \cdot nH_2O$  (VC-ZVO) was washed and then collected after freeze-dried for 72 h. The preparation of oxidized  $V_2CT_x$  is similar to the above method with 40 mL 0.015 wt%  $H_2O_2$  solution under 160 °C for 10 h.

### Synthesis of $V_2O_5 \cdot 1.6H_2O$ Nanobelts

0.32 g commercial  $V_2O_5$  (Jinshan chemical test, 99 wt%) were added into 30 mL deionized water. After 20 min of strong stirring, 5 mL 30 wt%  $H_2O_2$  solution was then slowly added into the solution. Then transfer the dispersion to the autoclave, and the facile hydrothermal reaction was carried out under 200 °C for 24 h. After cooling to room temperature, the reaction products were collected and obtained *via* freeze-dried for 72 h.

### Physical Characterization

The crystal information of the samples was defined by X-ray diffraction (XRD, Bruker D8 ADVANCED X-ray powder diffractometer, Cu K $\alpha$  radiation). The Fourier Transform Infrared Spectroscopy (FTIR, Nicolet Is10) was determined with a scan range from 2000 to 400 cm<sup>-1</sup>. Field-emission scanning electron microscopy (SEM, Tescan MAIA3 XMH), transmission electron microscopy (TEM, JEOL JEM-2100 LaB6), and their EDX components were used to observe the microstructure information and elements distribution of the samples. The surface elements were evaluated by X-ray photoelectron spectroscopy (XPS, PHI 5000C&PHI5300). The specific surface area and pore size distribution of the samples were measured by the Brunauer-Emmett-Teller instrument (BET, Micromeritics ASAP 2020). The V K-edge X-ray absorption spectroscopy (XAS) data were collected on beamline BL14W1 at the Shanghai Synchrotron Radiation Facility (SSRF).

### **Electrochemical Measurements**

CR2032 coin-type cells were used for electrochemical analysis. In detail, the working electrodes were made up of active material, carbon black (Aladdin reagent, 99.5%, ~30 nm) and polyvinylidene fluoride (PVDF) (Aladdin reagent) binder in a mass ratio of 7:2:1.0 was tightly mixed with 1-Methyl-2-pyrrolidinone (NMP) (Aladdin reagent, 99.5 wt%) to form a uniform slurry. It was coated on titanium substrate and dried in a vacuum oven at 60 °C for 14 h. The loading mass of the cathode is in the range of 1.6-1.8 mg. Zinc foil was used as the counter negative electrode, 3 M Zn(CF<sub>3</sub>SO<sub>3</sub>)<sub>2</sub> dissolved in deionized water as electrolyte, and glass microfiber filter membrane as the separator. The assembly process was carried out in an argon-filled glovebox (Mikrona). The rate performance, cycling capability, and GITT were carried out on the Land CT 2001A CELL test system in the range of 0.3-1.4 V at 25 °C. The capacity of the samples is calculated according to the mass of the active materials. In addition, the cyclic voltammetry curves of five scanning sections at each scanning rate were collected from the open circuit potential in a electrochemical workstation (PGSTAT302N, Metrohm) using a three-electrode set (0.3-1.4V vs Zn<sup>2+</sup>/Zn). On the same electrochemical workstation, the EIS was measured in the frequency range of 10<sup>5</sup>-0.01 Hz with 5 mV AC oscillation amplitude.

## Computational Methods

All calculations based on density functional theory were operated by the Vienna Ab-initio Simulation Package (VASP) with projector-augmented wave (PAW) pseudopotentials. The exchange-correlation functional was described by the generalized gradient approximation (GGA) of Perdew-Burke-Ernzerhof (PBE). The kinetic energy cut-off was set to 520 eV, and k-points were generated by Monkhorst-Pack grid of  $2 \times 3 \times 2$ . The energy tolerance and the allowed maximum Hellman-Feynman force on each atom were set to  $10^{-6}$  eV and  $0.01 \text{ eV \AA}^{-1}$ , respectively. The van der Waals dispersion correction was employed by the DFT-D2 method of Grimme. The LDA + U method was applied to the description of strongly correlated electrons for the density of states (DOS) calculations, with U of 3.1 eV for vanadium.<sup>1</sup>

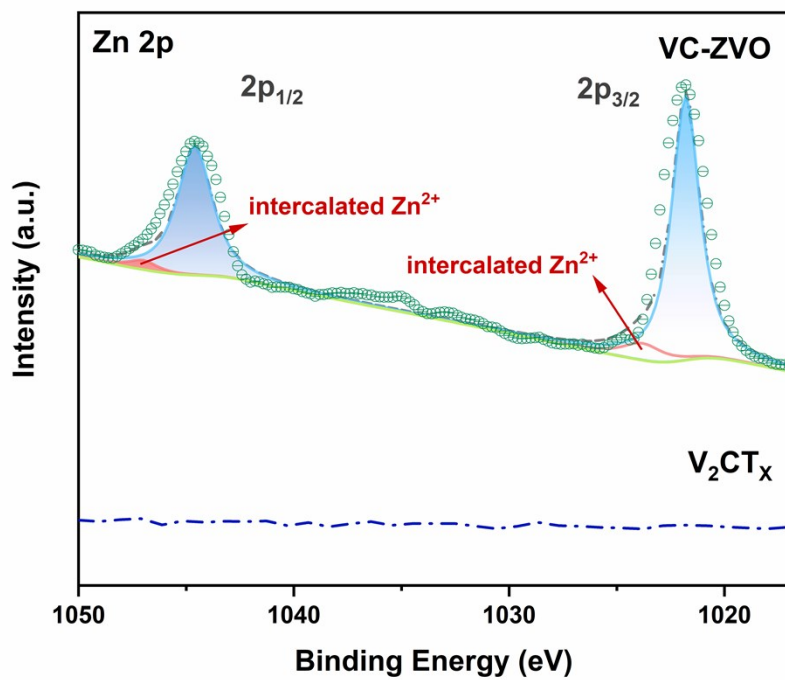

Fig. S1 XPS spectra of Zn 2p of V<sub>2</sub>CT<sub>x</sub> MXene and VC-ZVO.

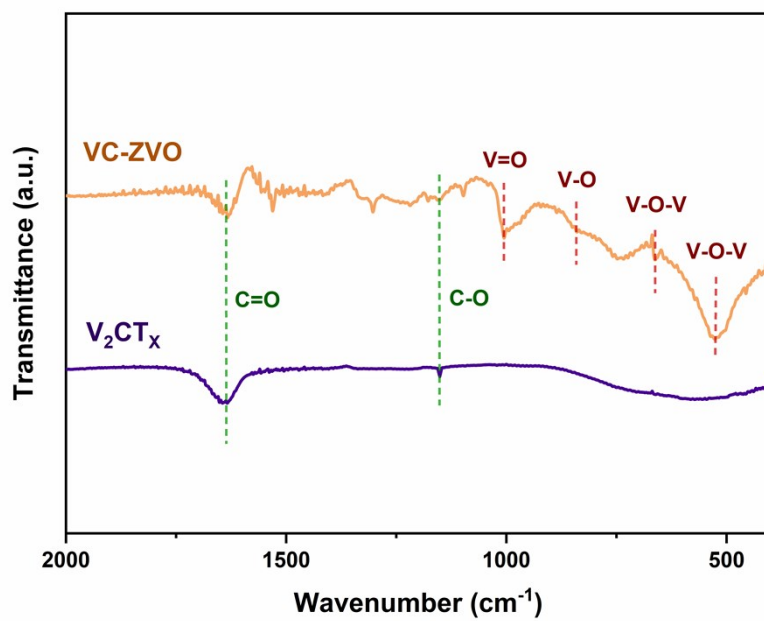

**Fig. S2** FTIR spectra of V<sub>2</sub>CT<sub>x</sub> MXene and VC-ZVO.

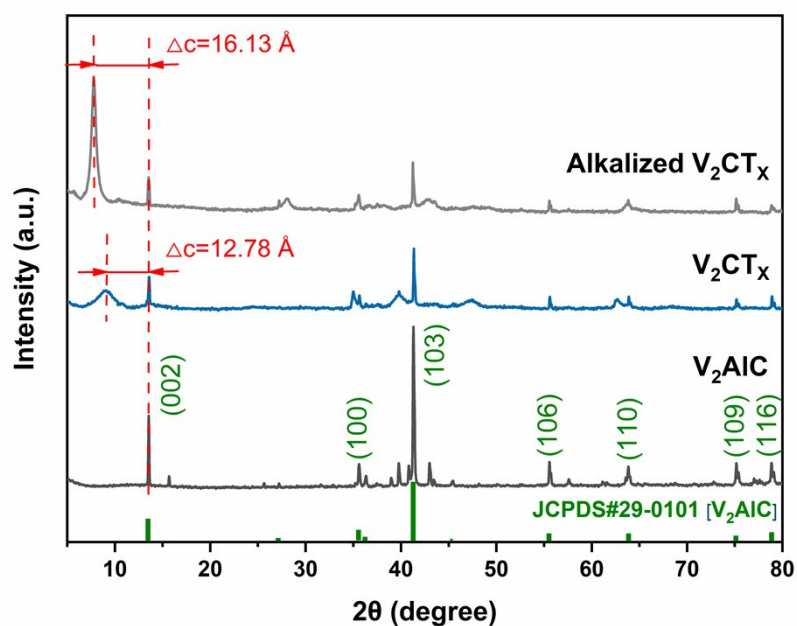

**Fig. S3** XRD pattern of  $V_2AlC$  MAX,  $V_2CT_x$  MXene and alkalized  $V_2CT_x$ .

The XRD results in Figure S3 show that the main diffraction peaks of  $V_2AlC$  correspond to JCPDS# 29-0101,<sup>2</sup> which verifies the successful synthesis of  $V_2AlC$  MAX phase. After the etching process, most of the diffraction peaks of  $V_2AlC$  are weakened, and a new peak appeared on the (002) plane of  $V_2CT_x$  at  $9.01^\circ$ . After alkalization, the (002) peak becomes sharper and shifts to a lower angle of  $7.78^\circ$ , indicating that  $Na^+$  intercalation in the interlayer of  $V_2CT_x$  leads to the expansion of interspace and a 1.136 nm gap between the layers of  $V_2CT_x$ .

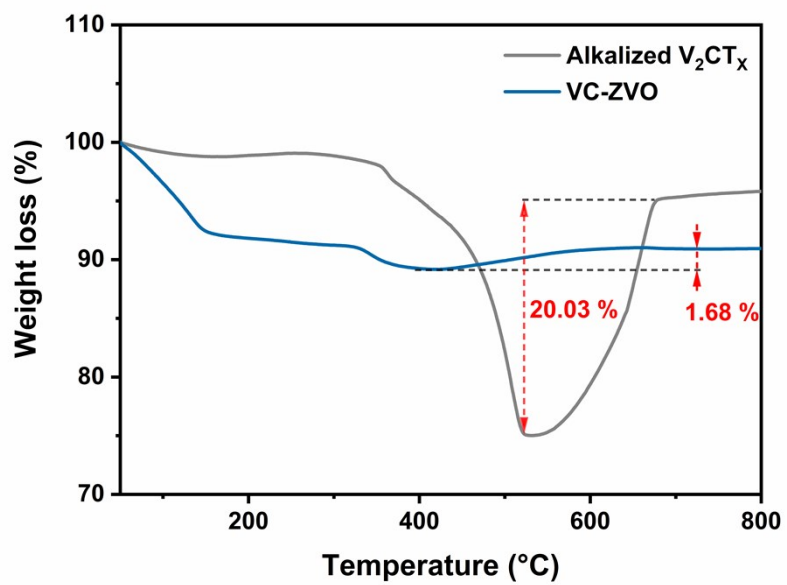

Fig. S4. TGA results for VC-ZVO and alkalized V<sub>2</sub>CT<sub>x</sub> samples.



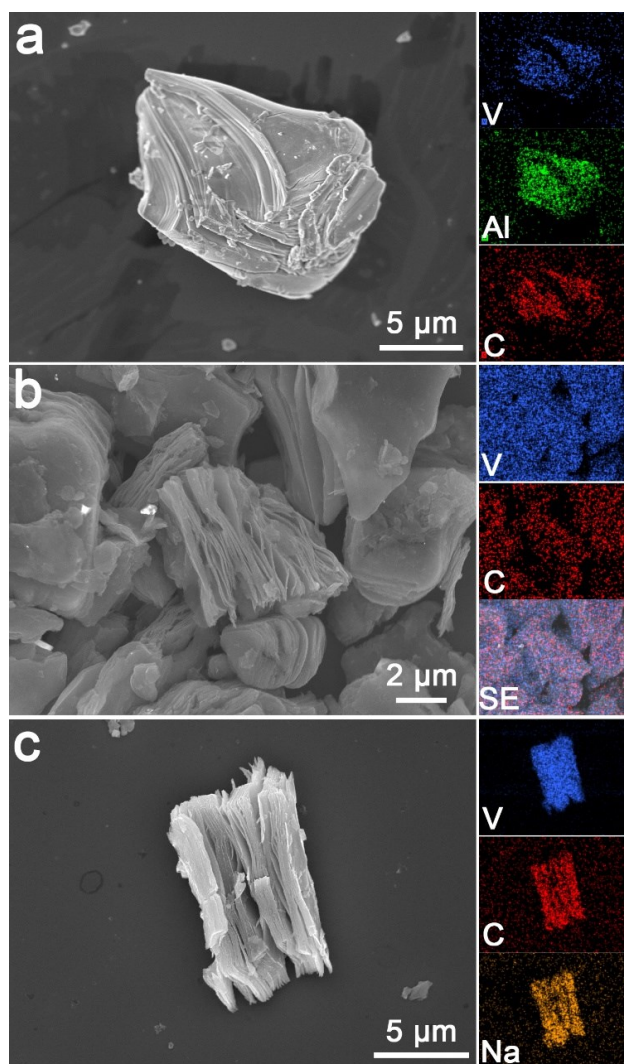

**Fig. S5** SEM images and corresponding element mapping of (a)  $V_2AlC$  MAX, (b)  $V_2CT_x$  MXene, and (c) alkalized  $V_2CT_x$ .

The typical SEM image of the  $V_2AlC$  MAX dense layered structure is shown in Figure S5a. After etching the Al layer from  $V_2AlC$  MAX by HF solution, typical accordion-like  $V_2CT_x$  with a smooth surface can be observed (Figure S5b). After alkalization and Na-ion intercalation, the morphology of  $V_2CT_x$  still displays a clear multilayer structure (Figure S5c). In addition, corresponding element mapping of alkalized  $V_2CT_x$  shows that the  $V_2CT_x$  stack is successfully intercalated with Na ions.

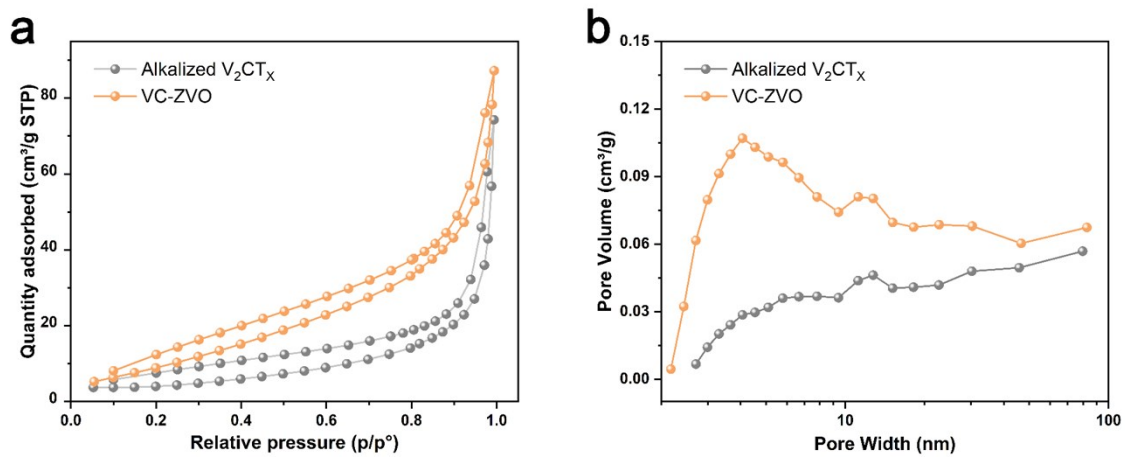

**Fig. S6** (a) Nitrogen sorption isotherms. (b) Pore size distribution of alkalized  $V_2CT_x$  and VC-ZVO.

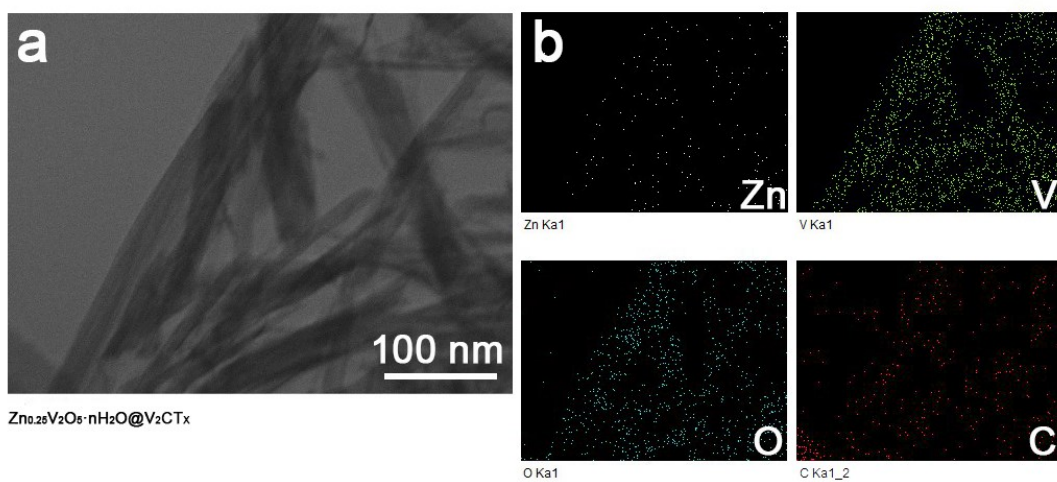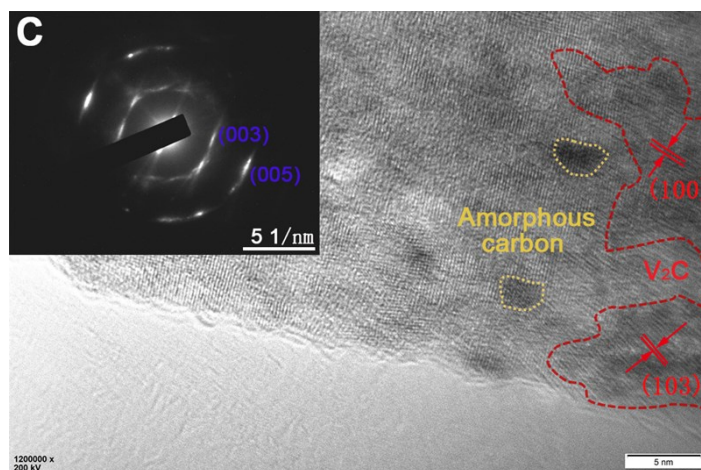

**Fig. S7** (a) TEM image of VC-ZVO and (b) corresponding EDX mapping. (c) HRTEM image of VC-ZVO (the inset illustrates the SAED image of ZVO).

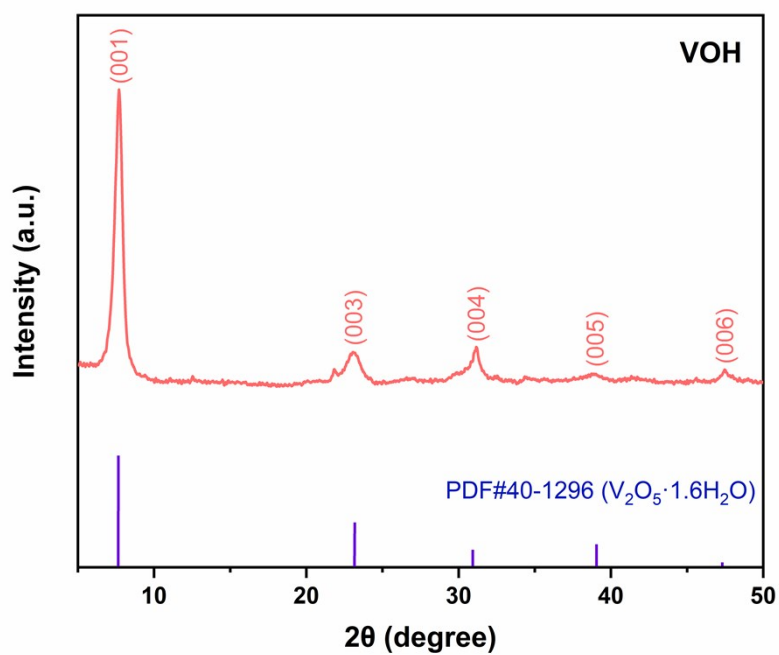

**Fig. S8** XRD patterns of VOH.

To study the electrochemical performance and kinetics of VC–ZVO, typical VOH was synthesized by a facile method (more details were shown in the Experimental Section). As shown in Figure S8, the synthetic sample is V<sub>2</sub>O<sub>5</sub>·1.6H<sub>2</sub>O (PDF#40-1296),<sup>3</sup> which has a layered structure of hydrated vanadate.

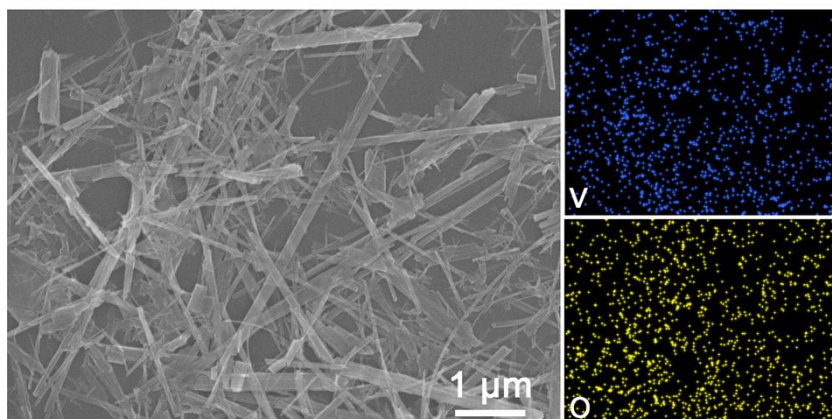

**Fig. S9** SEM images of VOH and the corresponding element mapping.

As shown in Figure S9, VOH shows ribbon-like morphology with slight agglomeration and a width around 100 nm, which is consistent with the typical morphology of hydrated vanadate. The corresponding EDX element diagrams show that V and O elements are evenly distributed in the sample.

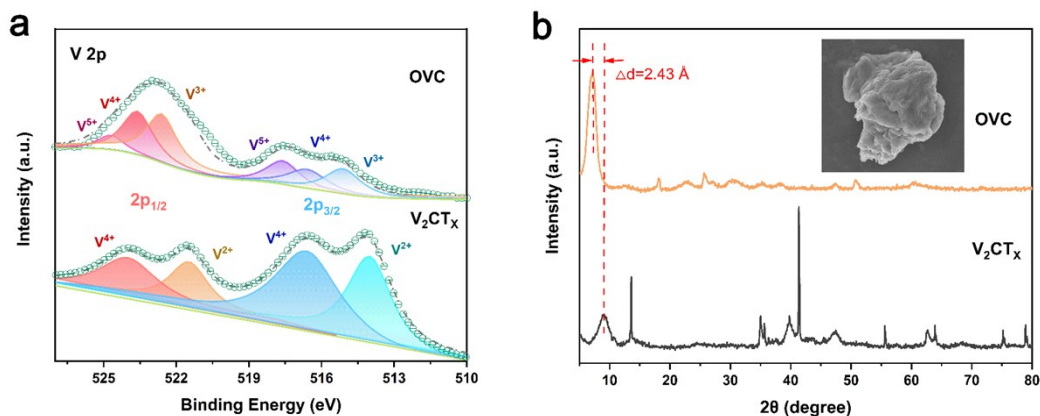

**Fig. S10** (a) XPS spectra and (b) XRD pattern of OVC and  $V_2CT_x$  (the inset illustrates the SEM image of OVC).

The oxidation treatment leads to the valence-state rise of  $V_2CT_x$  MXene, as shown by the detailed XPS spectra of V 2p in Figure S10a. Specifically,  $V^{5+}$  of OVC appears and becomes stronger, and the  $V^{5+}/V^{4+}/V^{3+}$  ratio matches the desirable phase transition.<sup>4</sup> Figure S10b shows the XRD patterns of OVC and  $V_2CT_x$ . Compared with the diffraction peak of  $V_2CT_x$ , the (002) peak of OVC becomes sharper and shifts down to  $7.25^\circ$  after oxidation treatment, indicating that water molecules intercalate  $V_2CT_x$  further. Moreover, the characteristic diffraction peaks of  $V_2AlC$  and  $V_2CT_x$  almost disappear, and diffraction peaks of vanadium oxide and carbon appear. As shown in the inset of the SEM image, OVC presents the accordion-like structure of  $V_2CT_x$ . Interestingly, due to the growth of the oxidized coating, the sharp edges and smooth surfaces of the original  $V_2CT_x$  become blurred and rough after the oxidation treatment. In the absence of pre-intercalated  $Zn^{2+}$  as template, the oxidized  $V_2CT_x$  could not be transformed into layered hydrated vanadate with the nanobelt morphology.

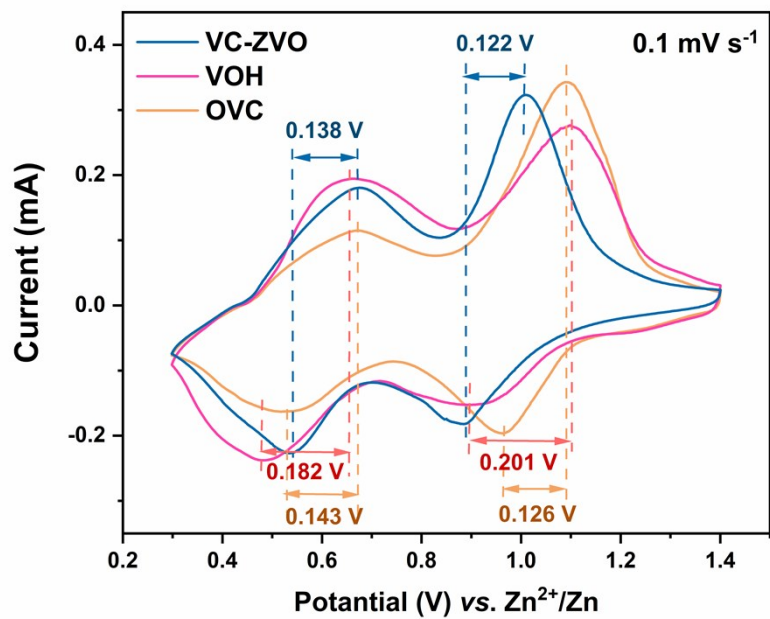

**Fig. S11.** Comparison of the 2<sup>nd</sup> CV curves of VC-ZVO, VOH and OVC at  $0.1 \text{ mV s}^{-1}$ .

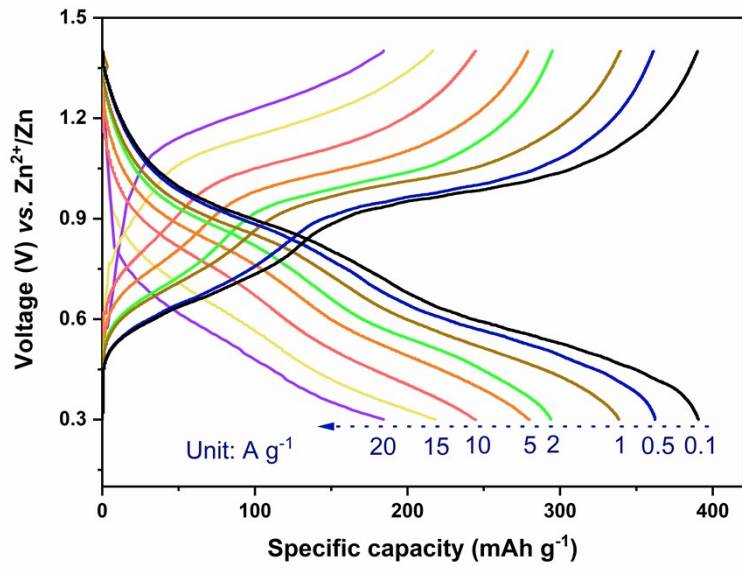

**Fig. S12.** Galvanostatic charge and discharge curves under various current densities for the VC-ZVO electrodes.



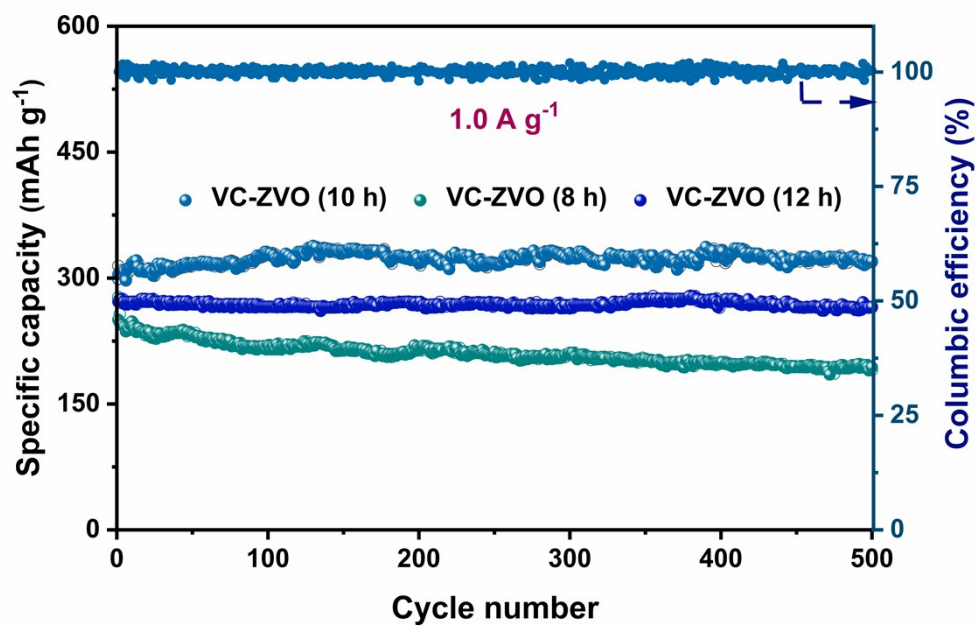

Fig. S13. Cycling performance of VC-ZVO obtained after different reaction time at 1.0 A g<sup>-1</sup>.

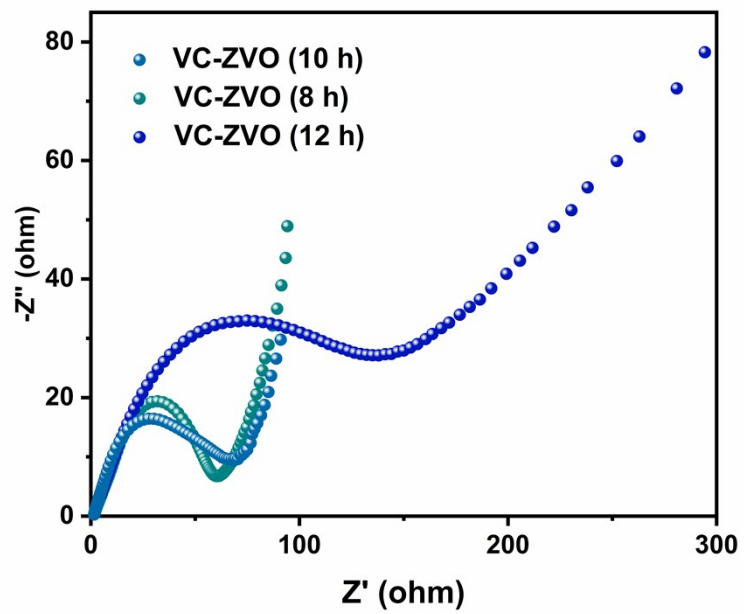

Fig. S14. EIS spectra of VC-ZVO obtained after different reaction time.

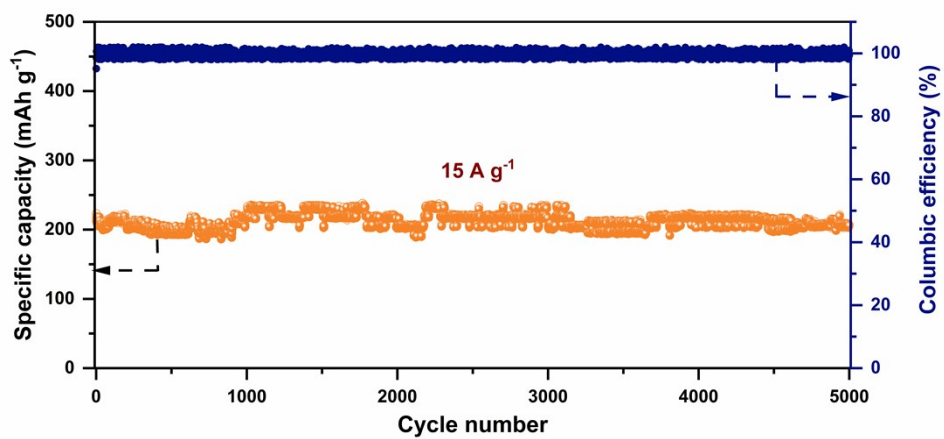

**Fig. S15.** Cycling performance of high current density of the VC-ZVO electrode at 15 A g<sup>-1</sup>.

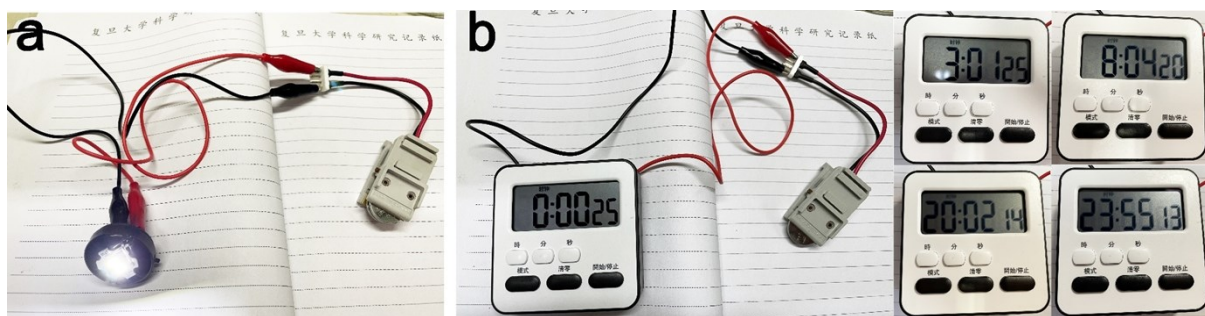

**Fig. S16.** (a) LED indicator powered by two cells. (b) Electronic timer powered by one cell.

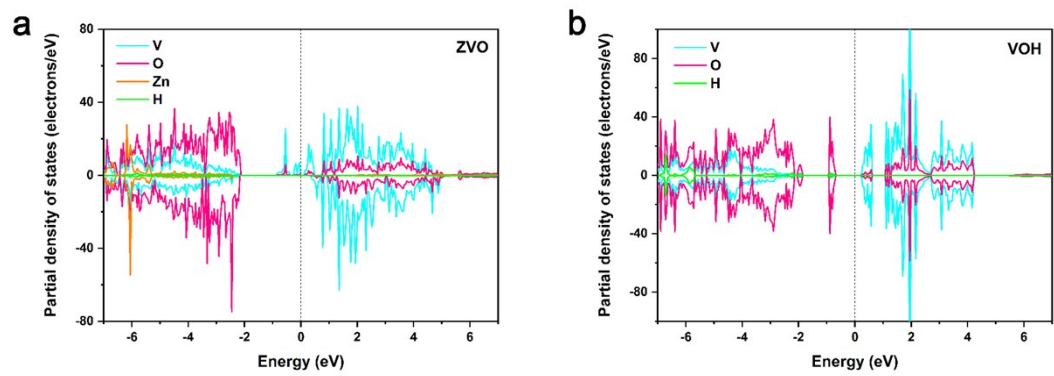

**Fig. S17.** Density of states for (a) ZVO and (b) VOH.

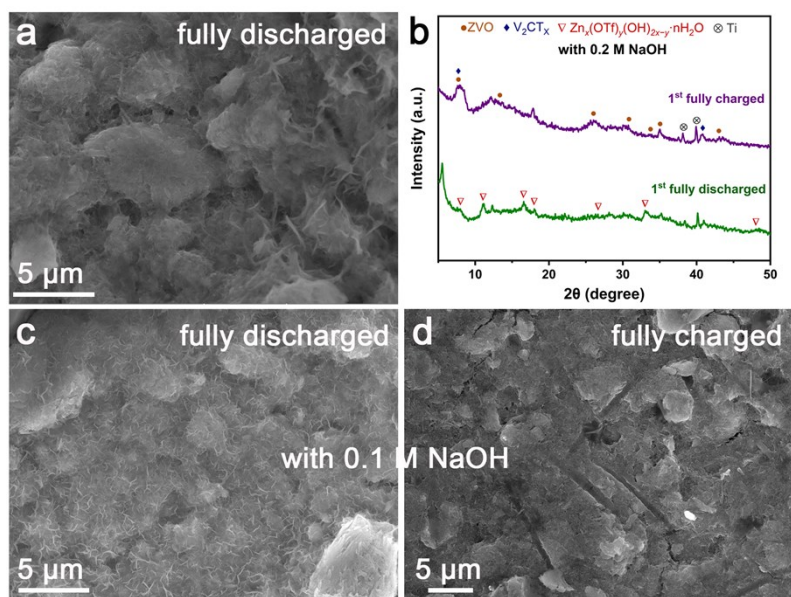

**Fig. S18.** (a) *Ex situ* SEM image of of the VC–ZVO electrodes at the fully discharged state. (b) *Ex situ* XRD patterns of of the VC–ZVO electrodes with 0.1 M NaOH electrolyte additive at different states. *Ex situ* SEM image of of the VC–ZVO electrodes with 0.1 M NaOH electrolyte additive at (c) the fully discharged state and (d) the fully charged state.

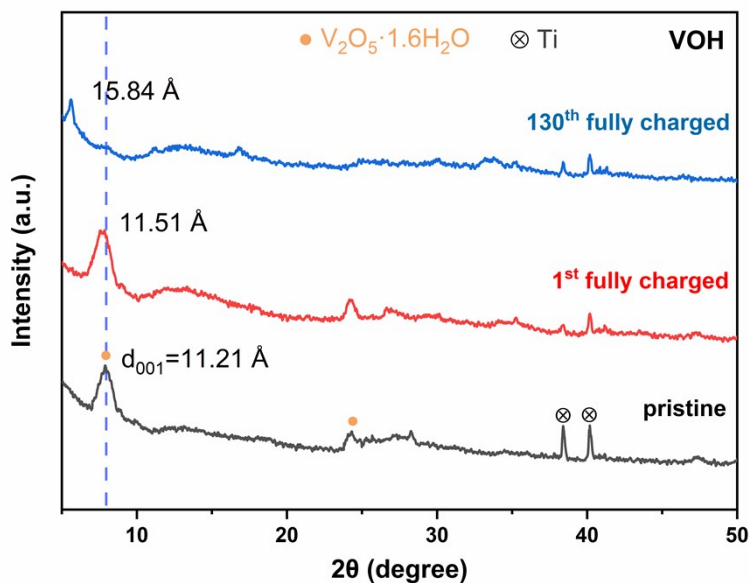

**Fig. S19.** *Ex situ* XRD patterns of the VOH electrodes after different cycles at 0.1 A g<sup>-1</sup>.

The crystal structure stability of the VOH electrodes as controlled samples after different cycles have been investigated (**Fig. S19**). After the first cycle, the (001) plane of VOH shows a slight deviation of 0.19°. Nevertheless, after 130 cycles, the (001) plane of VOH shifts greatly to 5.58°, indicating that the interlayer of VOH is irreversibly expanded and the crystal structure of VOH is destroyed. In addition, the intensity of the diffraction peak of VOH is also relatively weakened, suggesting that part of VOH dissolves during cycling.

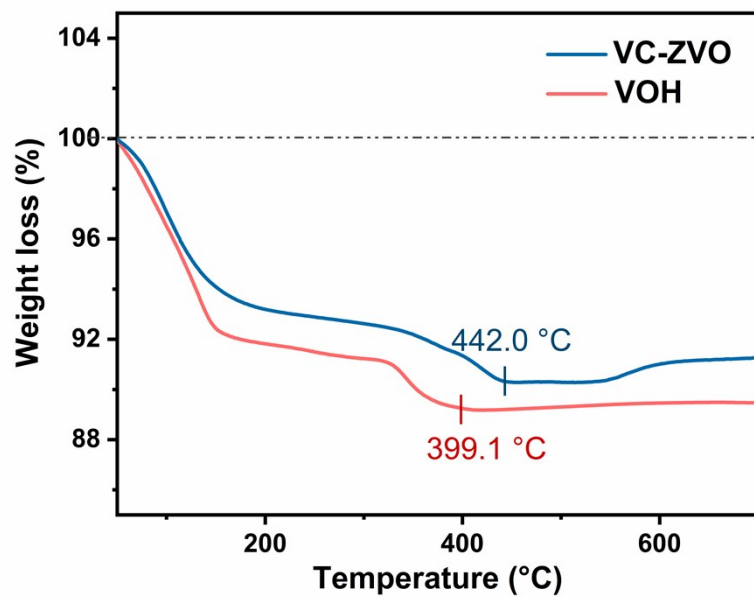

**Fig. S20.** TGA results for VC-ZVO and VOH samples.



**Table S1** Zinc ion diffusion coefficient of representative vanadium-based cathodes.

| <b>Cathode</b>                                                        | <b>Electrolyte</b>                                      | <b>D (cm<sup>2</sup> s<sup>-1</sup>)</b>       | <b>Reference</b> |
|-----------------------------------------------------------------------|---------------------------------------------------------|------------------------------------------------|------------------|
| <b>VC-ZVO</b>                                                         | <b>3 M Zn(CF<sub>3</sub>SO<sub>3</sub>)<sub>2</sub></b> | <b>1.3×10<sup>-7</sup>–6.3×10<sup>-8</sup></b> | <b>This work</b> |
| Zn <sub>0.25</sub> V <sub>2</sub> O <sub>5</sub> ·nH <sub>2</sub> O   | 1 M ZnSO <sub>4</sub>                                   | 10 <sup>-9</sup> –10 <sup>-10</sup>            | 5                |
| V <sub>5</sub> O <sub>12</sub> ·6H <sub>2</sub> O                     | 3 M Zn(CF <sub>3</sub> SO <sub>3</sub> ) <sub>2</sub>   | 10 <sup>-10</sup> –10 <sup>-11</sup>           | 6                |
| LixV <sub>2</sub> O <sub>5</sub> ·nH <sub>2</sub> O                   | 2 M ZnSO <sub>4</sub>                                   | 3.37×10 <sup>-8</sup> –3.3×10 <sup>-9</sup>    | 7                |
| Cu <sub>0.1</sub> V <sub>2</sub> O <sub>5</sub> ·0.08H <sub>2</sub> O | 2 M ZnSO <sub>4</sub>                                   | 10 <sup>-8</sup> –10 <sup>-9</sup>             | 8                |
| PEDOT-NH <sub>4</sub> V <sub>3</sub> O <sub>8</sub>                   | 3 M Zn(CF <sub>3</sub> SO <sub>3</sub> ) <sub>2</sub>   | 5.3–6.4×10 <sup>-9</sup>                       | 9                |

## Reference

- 1 A. Jain, G. Hautier, C. J. Moore, S. P. Ong, C. C. Fischer, T. Mueller, K. A. Persson and G. Ceder, *Comput. Mater. Sci.* 2011, 50, 2295-2310.
- 2 C. Wang, H. Xie, S. Chen, B. Ge, D. Liu, C. Wu, W. Xu, W. Chu, G. Babu, P. M. Ajayan and L. Song. *Adv. Mater.* 2018, 30, 1802525.
- 3 Z. Cao, X. Zhu, D. Xu, P. Dong, M. O. L. Chee, X. Li, K. Zhu, M. Ye and J. Shen. *Energy Storage Mater.* 2020, 36, 132-138.
- 4 X. Li, M. Li, Q. Yang, G. Liang, Z. Huang, L. Ma, D. Wang, F. Mo, B. Dong, Q. Huang and C. Zhi. *Adv. Energy Mater.* 2020, 2001791.
- 5 D. Kundu, B. D. Adams, V. Duffort, S. H. Vajargah and L. F. Nazar, *Nat. Energy* 2016, 1, 16119.
- 6 N. Zhang, M. Jia, Y. Dong, Y. Wang, J. Xu, Y. Liu, L. Jiao and F. Cheng, *Adv. Funct. Mater.* 2019, 29, 1807331.
- 7 Y. Yang, Y. Tang, G. Fang, L. Shan, J. Guo, W. Zhang, C. Wang, L. Wang, J. Zhou and S. Liang, *Energy Environ. Sci.*, 2018, 11, 3157-3162.
- 8 Y. Yang, Y. Tang, S. Liang, Z. Wu, G. Fang, X. Cao, C. Wang, T. Lin, A. Pan and J. Zhou, *Nano Energy* 2019, 61, 617.
- 9 D. Bin, W. Huo, Y. Yuan, J. Huang, Y. Liu, Y. Zhang, F. Dong, Y. Wang and Y. Xia, *Chem* 2020, 6, 968.
